# Supplementary material for: Crystal structure and magnetic properties of Pb2Ni(PO4)2
Source: Royal Society of Chemistry journal article supplement (doi:10.1039/c3dt00030c), 2013-01-01
Supplement: c3dt00030c.pdf [file c3dt00030c.pdf]

## Supporting Information

### Crystal Structure and Magnetic Properties of $\text{Pb}_2\text{Ni}(\text{PO}_4)_2$

Zhangzhen He<sup>\*,a</sup>, Weilong Zhang<sup>a</sup>, Tianlong Xia<sup>b</sup>, Weiqiang Yu<sup>b</sup>, and Wendan Cheng<sup>a</sup>

<sup>a</sup>*State Key Laboratory of Structural Chemistry, Fujian Institute of Research on the Structure of Mater, Chinese Academy of Sciences, Fuzhou, Fujian 350002, China.*

<sup>b</sup>*Department of Physics, Renmin University of China, Beijing 100872, China.*

**Tables S1-S3:** X-ray structural data for  $\text{Pb}_2\text{Ni}(\text{PO}_4)_2$

S2-S4

Table S1. Atomic coordinates ( $\times 10^4$ ) and equivalent isotropic displacement parameters ( $\text{\AA}^2 \times 10^3$ ) for  $\text{Pb}_2\text{Ni}(\text{PO}_4)_2$ .  $U(\text{eq})$  is defined as one third of the trace of the orthogonalized  $U_{ij}$  tensor.

|       | x         | y        | z       | U(eq) |
|-------|-----------|----------|---------|-------|
| Pb(1) | 2501(1)   | 4923(1)  | 8234(1) | 11(1) |
| Pb(2) | -2633(1)  | 7640(1)  | 3183(1) | 10(1) |
| Ni(1) | -7831(3)  | 6354(1)  | 4791(2) | 7(1)  |
| P(1)  | -7402(5)  | 6647(2)  | 941(3)  | 7(1)  |
| P(2)  | -2430(5)  | 9256(1)  | 773(3)  | 5(1)  |
| O(1)  | -4922(13) | 6529(5)  | -4(8)   | 15(2) |
| O(2)  | -6695(14) | 6818(4)  | 2685(9) | 15(2) |
| O(3)  | -8983(14) | 7409(4)  | 316(9)  | 12(1) |
| O(4)  | -8995(13) | 5806(4)  | 733(8)  | 11(1) |
| O(5)  | -3196(13) | 10182(4) | 1047(8) | 8(1)  |
| O(6)  | -1486(14) | 9041(4)  | -935(8) | 9(1)  |
| O(7)  | -126(13)  | 9027(4)  | 1849(8) | 8(1)  |
| O(8)  | -4614(13) | 8618(4)  | 1169(8) | 9(1)  |

Table S2. Selected bond lengths [Å] and angles (deg.) for Pb<sub>2</sub>Ni(PO<sub>4</sub>)<sub>2</sub>

|                     |          |                     |          |
|---------------------|----------|---------------------|----------|
| Pb(1)-O(4)#1        | 2.338(7) | Pb(1)-O(6)#2        | 2.431(7) |
| Pb(1)-O(7)#3        | 2.435(7) | Pb(1)-O(4)#4        | 2.634(7) |
| Pb(1)-O(1)          | 2.984(7) | Pb(1)-O(5)          | 2.934(7) |
| Pb(2)-O(1)#3        | 2.336(7) | Pb(2)-O(8)          | 2.504(7) |
| Pb(2)-O(2)          | 2.529(8) | Pb(2)-O(3)#5        | 2.638(8) |
| Pb(2)-O(6)          | 2.771(7) | Pb(2)-O(7)          | 2.762(8) |
| Ni(1)-O(2)          | 2.009(7) | Ni(1)-O(5)#6        | 2.019(6) |
| Ni(1)-O(3)#3        | 2.056(7) | Ni(1)-O(8)#3        | 2.059(7) |
| Ni(1)-O(6)#7        | 2.116(7) | Ni(1)-O(7)#7        | 2.199(7) |
| P(1)-O(3)           | 1.538(7) | P(1)-O(2)           | 1.540(8) |
| P(1)-O(1)           | 1.545(7) | P(1)-O(4)           | 1.559(7) |
| P(2)-O(5)           | 1.507(6) | P(2)-O(8)           | 1.555(7) |
| P(2)-O(7)           | 1.559(8) | P(2)-O(6)           | 1.561(7) |
| O(2)-Ni(1)-O(5)#6   | 86.0(3)  | O(2)-Ni(1)-O(3)#3   | 86.9(3)  |
| O(5)#6-Ni(1)-O(3)#3 | 171.9(3) | O(2)-Ni(1)-O(8)#3   | 104.2(3) |
| O(5)#6-Ni(1)-O(8)#3 | 89.7(3)  | O(3)#3-Ni(1)-O(8)#3 | 95.9(3)  |
| O(2)-Ni(1)-O(6)#7   | 96.9(3)  | O(5)#6-Ni(1)-O(6)#7 | 83.4(3)  |
| O(3)#3-Ni(1)-O(6)#7 | 93.5(3)  | O(8)#3-Ni(1)-O(6)#7 | 157.3(3) |
| O(2)-Ni(1)-O(7)#7   | 163.6(3) | O(5)#6-Ni(1)-O(7)#7 | 100.7(2) |
| O(3)#3-Ni(1)-O(7)#7 | 85.1(3)  | O(8)#3-Ni(1)-O(7)#7 | 90.9(3)  |
| O(6)#7-Ni(1)-O(7)#7 | 69.4(3)  |                     |          |
| O(3)-P(1)-O(2)      | 109.1(4) | O(3)-P(1)-O(1)      | 111.9(4) |
| O(2)-P(1)-O(1)      | 107.9(4) | O(3)-P(1)-O(4)      | 107.9(4) |
| O(2)-P(1)-O(4)      | 112.4(4) | O(1)-P(1)-O(4)      | 107.6(4) |
| O(5)-P(2)-O(8)      | 111.8(4) | O(5)-P(2)-O(7)      | 109.7(4) |
| O(8)-P(2)-O(7)      | 108.1(4) | O(5)-P(2)-O(6)      | 115.5(4) |
| O(8)-P(2)-O(6)      | 107.5(4) | O(7)-P(2)-O(6)      | 103.9(4) |

Symmetry transformations used to generate equivalent atoms:

#1 -x,-1,-y+1,-z+1    #2 -x,y-1/2,-z+1/2    #3 x,-y+3/2,z+1/2    #4 x+1,y,z+1  
 #5 x+1,-y+3/2,z+1/2    #6 -x-1,y-1/2,-z+1/2    #7 x-1,-y+3/2,z+1/2  
 #8 x+1,-y+3/2,z-1/2    #9 x,-y+3/2,z-1/2    #10 x-1,-y+3/2,z-1/2    #11 x-1,y,z-1  
 #12 -x-1,y+1/2,-z+1/2    #13 -x,y+1/2,-z+1/2

Table S3. Anisotropic displacement parameters ( $\text{\AA}^2 \times 10^3$ ) for  $\text{Pb}_2\text{Ni}(\text{PO}_4)_2$ . The anisotropic displacement factor exponent takes the form:  $-2\pi^2[h^2a^{*2}U_{11} + \dots + 2hka^*b^*U_{12}]$

|       | U11   | U22   | U33   | U23   | U13  | U12   |
|-------|-------|-------|-------|-------|------|-------|
| Pb(1) | 17(1) | 7(1)  | 7(1)  | 0(1)  | 1(1) | -1(1) |
| Pb(2) | 19(1) | 6(1)  | 7(1)  | 2(1)  | 2(1) | 1(1)  |
| Ni(1) | 14(1) | 3(1)  | 5(1)  | 1(1)  | 1(1) | 0(1)  |
| P(1)  | 14(1) | 3(1)  | 4(1)  | 1(1)  | 3(1) | -1(1) |
| P(2)  | 10(1) | 3(1)  | 3(1)  | 1(1)  | 2(1) | 0(1)  |
| O(1)  | 15(2) | 14(2) | 15(2) | 0(1)  | 1(1) | 0(1)  |
| O(2)  | 16(2) | 15(2) | 15(2) | 0(1)  | 0(1) | -1(1) |
| O(3)  | 13(2) | 12(2) | 13(2) | 1(1)  | 0(1) | 0(1)  |
| O(4)  | 11(2) | 11(2) | 11(2) | 0(1)  | 0(1) | 0(1)  |
| O(5)  | 8(2)  | 7(2)  | 8(2)  | -1(1) | 0(1) | 0(1)  |
| O(6)  | 10(2) | 9(2)  | 8(2)  | 0(1)  | 0(1) | 0(1)  |
| O(7)  | 9(2)  | 8(2)  | 8(2)  | 0(1)  | 0(1) | 0(1)  |
| O(8)  | 9(2)  | 8(2)  | 9(2)  | 1(1)  | 0(1) | -1(1) |
